# Supplementary material
Source: PubMed Central journal article supplement (PMC8287852)
Supplement: mmc1.pdf [file mmc1.pdf]

**Supplementary table 1. Univariable analysis of mortality**

|                                        | Alive (387)     | Death (130)     | p-value |
|----------------------------------------|-----------------|-----------------|---------|
| <b>Epidemiological features, n (%)</b> |                 |                 |         |
| Age, mean $\pm$ SD                     | 64.3 $\pm$ 13.2 | 79.4 $\pm$ 11.6 | <0.001  |
| Female                                 | 183 (47)        | 44 (34)         | 0.008   |
| Arterial hypertension                  | 163 (42)        | 96 (74)         | <0.001  |
| Diabetes                               | 53 (14)         | 38 (29)         | <0.001  |
| Chronic kidney disease                 | 19 (5)          | 18 (14)         | 0.001   |
| Hypercholesterolemia                   | 121 (31)        | 66 (51)         | <0.001  |
| Smoking                                | 22 (6)          | 5 (4)           |         |
| COPD                                   | 22 (6)          | 19 (15)         | 0.001   |
| Ischemic cardiac disease               | 23 (6)          | 18 (14)         | 0.004   |
| Previous AF episodes                   | 23 (6)          | 25 (19)         | <0.001  |
| Cardiomyopathy                         | 3 (1)           | 7 (5)           | 0.003   |
| Previous heart failure admission       | 2 (1)           | 5 (4)           | 0.013   |
| LVEF                                   | 61.7 $\pm$ 7.7  | 61.2 $\pm$ 9.5  | 0.726   |
| <b>Chronic oral treatment, n (%)</b>   |                 |                 |         |
| RAAS inhibitors                        | 127 (33)        | 67 (52)         | <0.001  |
| Diuretics                              | 68 (18)         | 44 (34)         | <0.001  |
| Calcium-antagonists                    | 43 (11)         | 21 (16)         | 0.128   |
| Beta-blockers                          | 52 (14)         | 41 (32)         | <0.001  |
| Anticoagulation                        | 26 (7)          | 28 (22)         | <0.001  |
| Statins                                | 112 (29)        | 49 (38)         | 0.344   |
| <b>Clinical findings, n (%)</b>        |                 |                 |         |

|                                                |                |               |        |
|------------------------------------------------|----------------|---------------|--------|
| Days until admission, mean $\pm$ SD            | 8.7 $\pm$ 5.7  | 5.4 $\pm$ 3.6 | <0.001 |
| Length of admission (days), mean $\pm$ SD      | 10.4 $\pm$ 6.1 | 9.9 $\pm$ 8.7 | 0.545  |
| Max temperature, mean $\pm$ SD                 | 37.8 $\pm$ 1   | 37.7 $\pm$ 1  | 0.221  |
| Cough                                          | 265 (69)       | 70 (54)       | 0.003  |
| Rhinorrhea                                     | 10 (3)         | 1 (1)         | 0.471  |
| Dyspnea                                        | 157 (41)       | 77 (59)       | <0.001 |
| Myalgias                                       | 87 (23)        | 12 (9)        | 0.001  |
| Diarrhea                                       | 115 (30)       | 20 (15)       | 0.001  |
| Odynophagia                                    | 32 (9)         | 1 (1)         | 0.004  |
| Headache                                       | 21 (5)         | 3 (2)         | 0.144  |
| Vomits                                         | 23 (6)         | 3 (2)         | 0.101  |
| Anosmia                                        | 38 (10)        | 2 (2)         | 0.002  |
| <b>Treatment during hospitalization, n (%)</b> |                |               |        |
| Anticoagulation                                | 246 (64)       | 80 (62)       | 0.679  |
| Lopinavir/ritonavir                            | 367 (97)       | 96 (84)       | <0.001 |
| Hydroxychloroquine                             | 375 (99)       | 100 (87)      | <0.001 |
| Azithromycin                                   | 358 (95)       | 108 (94)      | 0.824  |
| Ceftriaxone                                    | 244 (64)       | 87 (76)       | 0.024  |
| Intravenous steroids                           | 211 (56)       | 82 (71)       | 0.003  |
| B1 Beta-Interferon                             | 151 (40)       | 61 (53)       | 0.012  |
| Tocilizumab                                    | 13 (3)         | 4 (4)         | 0.999  |
| <b>Laboratory results at admission, n (%)</b>  |                |               |        |
| Leucocytes > 10.000/mm <sup>3</sup>            | 41 (11)        | 48 (37)       | <0.001 |

|                                     |          |          |        |
|-------------------------------------|----------|----------|--------|
| Leucocytes < 4.000/mm <sup>3</sup>  | 53 (14)  | 11 (9)   | 0.111  |
| Lymphocytes < 1.000/mm <sup>3</sup> | 167 (43) | 84 (65)  | <0.001 |
| Hemoglobin <10 g/dL                 | 16 (4)   | 16 (12)  | 0.001  |
| Platelets <150.000/mm <sup>3</sup>  | 64 (17)  | 37 (29)  | 0.003  |
| D dimer > 500 ug/L                  | 246 (67) | 100 (83) | 0.001  |
| Creatinine > 1.5 mg/dL              | 23 (6)   | 50 (39)  | <0.001 |
| CRP > 10 mg/L                       | 330 (87) | 120 (95) | 0.016  |
| Procalcitonin > 0.5 ng/mL           | 15 (5)   | 41 (38)  | <0.001 |
| LDH > 250 U/L                       | 213 (57) | 100 (82) | <0.001 |
| <b>Adverse events, n (%)</b>        |          |          |        |
| Acute myocardial infarction         | 1 (0.3)  | 0        | 0.999  |
| Myocarditis                         | 1 (0.3)  | 0        | 0.999  |
| Heart failure                       | 4 (2)    | 5 (5)    | 0.022  |
| Ventricular arrhythmia              | 0        | 1 (1)    | 0.208  |
| Atrial fibrillation                 | 27 (7)   | 27 (21)  | <0.001 |
| Acute respiratory failure           | 108 (29) | 109 (88) | <0.001 |
| ICU admission                       | 14 (4)   | 30 (25)  | <0.001 |
| Mechanical ventilation              | 13 (4)   | 27 (26)  | <0.001 |
| Major bleeding                      | 6 (2)    | 10 (8)   | 0.999  |
| Pulmonary embolism                  | 9 (2)    | 2 (2)    | 0.739  |
| Stroke                              | 3 (1)    | 4 (3)    | 0.069  |

AF: atrial fibrillation. SD: standard deviation. COPD: Chronic obstructive pulmonary

disease. LVEF: left ventricle ejection fraction. RAAS: renin-angiotensin-aldosterone

system. CRP: C-reactive protein, LDH: lactate dehydrogenase. ICU: intensive care unit.
